# Supplementary material for: ESD Ideas: Positive Tipping points towards global regenerative systems
Source: Copernicus journal article supplement (doi:10.5194/egusphere-2023-2423), 2023-10-25

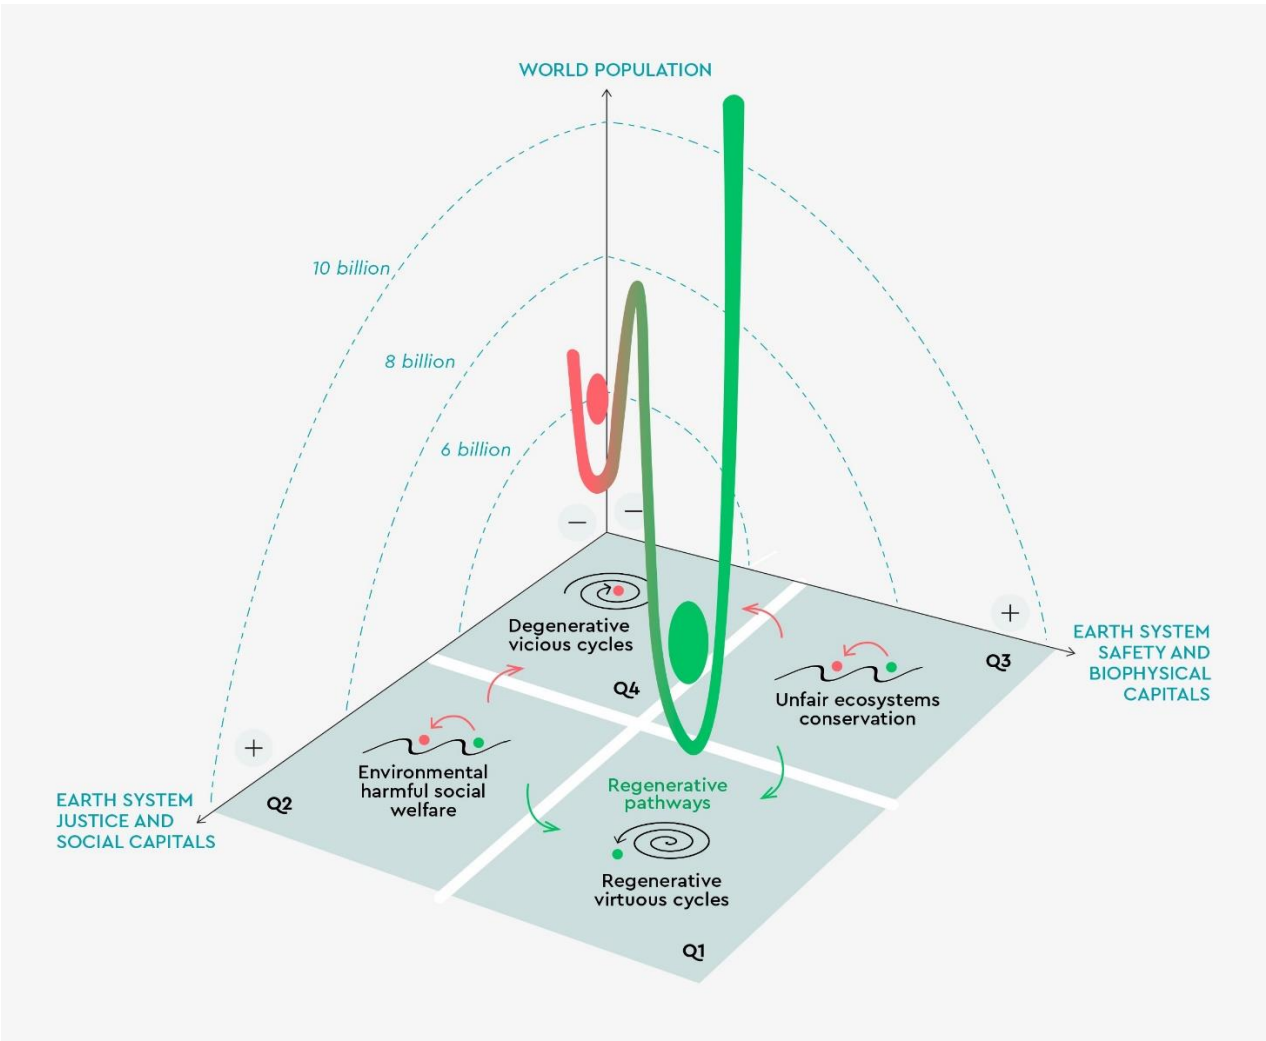

Supplement: Supplementary file [file egusphere-2023-2423-AC5-supplement.pdf]
