# Supplementary material for: ESD Ideas: Positive Tipping points towards global regenerative systems
Source: Copernicus journal article supplement (doi:10.5194/egusphere-2023-2423), 2023-10-25
Supplement: Supplementary file [file egusphere-2023-2423-RC3-supplement.pdf]

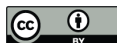

1

2

## 3 **ESD Ideas: Positive Tipping points towards global regenerative systems**

4

**J. David Tàbara**

5

Global Climate Forum, Berlin

6

and Autonomous University of Barcelona, Department of Geography

7

Campus UAB, Cerdanyola del Vallés (Barcelona), Catalonia, Spain

8

**Correspondence:** J. David Tàbara: [jdt@sustainability.eu](mailto:jdt@sustainability.eu)

9

### 10 **Abstract:**

11

12 Coping with the threats posed by multiple negative Earth tipping points calls for large coordinated  
13 actions conducive to creating long-lasting positive synergies between human and biophysical  
14 systems. Boundary concepts, engaging narratives and aspirational visions play a crucial role in  
15 coordinating the kinds of deliberate transformations needed to address global existential  
16 challenges. The regenerative sustainability paradigm offers an enabling cognitive and discursive  
17 capacity to integrate the insights from social and natural sciences so net-positive tipping points  
18 towards a safe and just space for humanity can better be operationalised, coordinated and enacted  
19 within and across multiple kinds of social-ecological systems.

20

### 21 **1. Introduction**

22 Our world is a world of systems of systems. Energy systems, agri-food systems, financial systems, urban mobility  
23 systems, information systems, educational systems, religious systems and many others; they all operate with their  
24 bounded rationalities, organisations and normative rules that justify their existence in different ways. Each system  
25 also has its effects on other systems, which can be detrimental or beneficial to the goals and development of  
26 these other systems. Given such complexity and heterogeneity social scientists conceptualise each system change  
27 using different approaches and metrics than natural scientists do. So when transdisciplinary teams meet together  
28 to try to find transformative pathways and solutions to cope with large and existential risks, like those posed by  
29 Earth tipping points, not only might different individuals look at different systems, but they might also look at a  
30 same system in different ways.

31 Hence, robust knowledge and actions aimed at dealing with the increasing threats of negative Earth tipping points  
32 does not only require reflexive spaces conducive to mutual learning among such diversity of perspectives. But  
33 it also requires higher-order concepts, engaging narratives and visions able to provide actionable sense of the  
34 complexity entailed in understanding such threats. In this contribution, I argue that the regenerative  
35 sustainability paradigm offers such cognitive and discursive collective capacity to integrate the insights from  
36 diverse social and natural sciences in a way that *net-positive tipping points* can be operationalised, coordinated  
37 and enacted better within and across multiple kinds of social-ecological systems and actions.

35

36

37

38

39

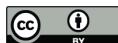

## 40      2. From less harm to net-positive tipping points

41      A tipping point can be defined as the moment at which an additional force of change makes a given system adopt  
42      a fundamentally different configuration and long-term dynamics, either by getting onto a new development  
43      trajectory or by evolving around a new system's attractor. In the case of positive tipping points in social-  
44      ecological systems (Tàbara 2018, Lenton 2020; Otto et al. 2020) we assume that the new dynamics  
45      contribute to improve the quality of life, long-term human sustainability and thus can help avoid existential risks  
46      derived from negative global environmental change.

47      Nevertheless, a major difficulty in conceptualising positive tipping points has to do with agreeing on what positive  
48      means. A dominant view in mainstream economics tends to assume and communicate to the large publics that  
49      an increase in GNP is positive, while a reduction is negative. Such narrow, *short-termist* and exemptionalist  
50      (Dunlap, 1980) understanding of socio-economic development, however, tends to disregard the negative  
51      cumulative effects of past social-ecological interactions on the quality and quantity of life-support systems.  
52      Greenhouse emissions, biodiversity loss or the accumulation of persistent pollutants (not registered in  
53      corporate and national accounts as collective losses) also affect future options and conditions for  
54      development negatively. Hence, it is clear that a more nuanced and coupled understanding of wealth and  
55      development, that takes into account all the interactions and feedbacks -both positive and negative- with the  
56      natural world, is needed.

57      Alternatively, and using a whole-life systems perspective, it can simply be argued that positive is what  
58      contributes to the maintenance, improvement and self-regeneration of social-ecological conditions that  
59      make human societies flourish and remain in the long term on Earth; whilst negative simply constitutes the  
60      opposite, destroying life support systems and degrading such sustainability conditions. A lot of the public  
61      discourses on sustainability, however, have focused on products and services that only contribute to  
62      generating 'less harm' (<0), or to policy commitments that aim at 'neutral targets' (=0); rather than actually  
63      improving social-ecological systems in net positive terms (>0). In this regard, *relative positive tipping points*, or  
64      those that focus on partial gains, may be associated with sectorial socio-technical transitions; while net-  
65      positive or *absolute positive tipping points* can be associated with those achieved by full-systems  
66      transformations, that entail changes in social practices, relationships and worldviews, and that eventually  
67      enhance the conditions for the self-regeneration of life-support systems on Earth (Tàbara 2023).

## 68      3. Positive synergies between social and biophysical systems

69      Positive tipping points can occur in many social systems, for instance, when access to education, health services  
70      or effective political participation and rights are granted to marginalised populations. But also in biophysical  
71      systems, as happens when a previously degraded ecosystem eventually regains its properties and conditions for  
72      self-regeneration. Although social and natural scientists tend to focus on one or the other, a regenerative  
73      perspective of sustainable development means that positive synergies between both are required (see also  
74      Buckton et al., 2023). In a world moving towards possibly 10 billion people by 2050, coping with global risks will  
75      depend not only on the health of the ecosystems -the safe planetary boundaries (Rockstrom et al. 2021) but  
76      most importantly on the possibility to improve the social conditions and institutions that ensure equity, social  
77      cohesion, mutual support, and effective and trusted governance of the common good (Gupta et al. 2023).

78      Finding explicit, operational and visual means able to identify the requirements needed to move present global  
79      development trajectory away from a degenerative attractor to a regenerative one is urgently required. This is  
80      represented in Figure 1, based on the SEIC conceptual model (Tàbara 2023) in which all social-ecological  
81      systems and societies and individuals' interactions are seen to be inevitably conditioned by four kinds of  
82      subsystems: structures and rules (S), energy and natural resource use (E), information and knowledge  
83      systems (I), and cumulative or depletive environmental change (C). In this way, the model also helps to identify  
84      the places to intervene in the overall social-ecological system, as improving social systems on the one side is  
85      therefore mostly a function of the S and I subsystems, whilst improving biophysical systems depends on to the  
86      extend interactions,

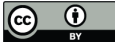

85 feedback and cumulative/depletive processes occurring in E and C subsystems can be harnessed and reoriented  
86 towards a regenerative trajectory.

87 Thus, the two lower axes of Figure 1 mean on the one hand, variations in social system conditions (or capital)  
88 and equity, that make social cohesion, good governance and agents' cooperation and collaboration possible as  
89 collective action; while the other axis represents changes in the quality and quantities of the biophysical stocks  
90 necessary for the long-term functioning of life-support systems. Achieving partial gains -or relative tipping  
91 points- that only improve equity and social conditions in a way that eventually leads to the depletion or  
92 degradation of biophysical conditions - ecological capital or stocks- will eventually lead to overall negative  
93 system tipping points (Q2). Similarly, gains in environmental protection, Earth systems safety, or the  
94 improvement in the quality of ecosystems that are being made at the cost of social equity and participation  
95 eventually are also likely to be rejected or undermined and result in a negative tipping point (Q3). Contexts or  
96 societies lacking fair and competent governance structures, as is the case of countries with rampant corruption  
97 or inequality are also likely to derive towards further ecosystems degradation, so that the whole social-  
98 ecological dynamics will descend and propagate into a full-systems negative tipping point (Q4). It is only by  
99 creating self-propelling virtuous circles that improve *at the same time* the just and safety conditions in multiple  
100 kinds of systems that net-positive absolute tipping points may be achieved at the global level (Q1). In this  
101 quadrant Q1, the 'ecospace' (Gupta et al. 2023) or the just and safe space for humanity would expand  
102 (represented by the growing green dot), contrary to what would occur in Q4 (represented by the shrinking red  
103 dot). Nevertheless, such net-positive global outcome may only be realised by processes of sustainability  
104 learning in which a key question to be addressed for science would not be only 'what is the problem?', but  
105 namely 'who is part of the solution?', and how these agents can be empowered (Tàbara, Jäger et al. 2018) to  
create positive synergistic interactions with the natural world:

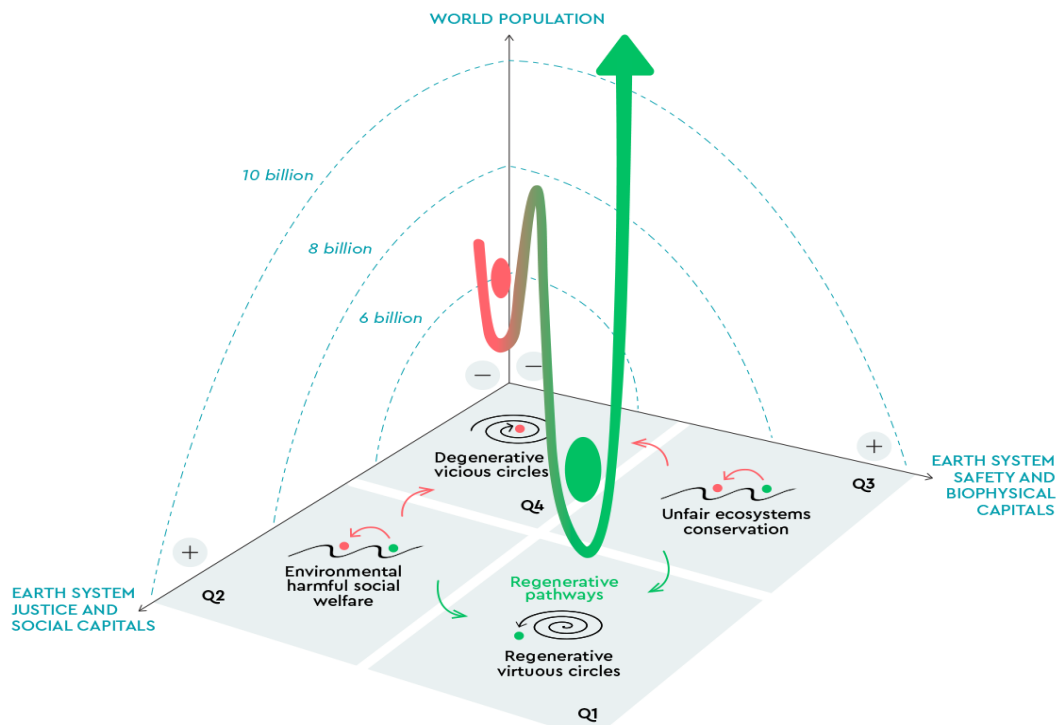

106

107 **Figure 1: Achieving a global net-positive tipping point towards a regenerative attractor that increases**  
108 **the safe and just operating space for humanity in a world moving towards 10 billion people requires**  
109 **synergising fast improvements in global social conditions (or capitals) and biophysical conditions.**  
110 (Based on Tàbara, 2023).

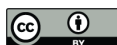

111 **4. Conclusion:**

112 Coping with the large systemic risks posed by negative Earth tipping points needs the coordination of multiple  
113 kinds of systems in such a way that all can contribute to the just improvement and restoration of the  
114 conditions that make human life possible on Earth in the long term. Visions and narratives towards  
115 regenerative futures can play this role because they are necessarily inclusive and engaging -as after all, the  
116 challenge of sustainability is a large-scale global engaging challenge. This is also so because moving towards a  
117 global regenerative trajectory or regenerative global systems' attractor (contrary to Malthusian positions)  
118 needs everybody's capacities and sources of transformative imagination (Galafassi, 2018) to expand and  
119 improve a social-ecological space in which everyone in a world of 10 billion people can potentially be better-  
120 off. The regenerative sustainability vision and paradigm can contribute to coordinate the many kinds of  
121 transformations needed to achieve a global net-positive tipping point at global scale. However, much  
122 transdisciplinary and integrated research is yet lacking and still required to understand, operationalise and  
123 foster the potential synergies between improvements in global social-ecological conditions and biophysical  
124 capitals regeneration so as to guarantee a safe and just space for humanity.

123 **References:**

- 124 Buckton S.J., Fazey I., Sharpe B., Om S., Doherty B., Denby K., Lait R., Bridle S., Bryant M., Collins L.,  
125 Kluczkovski  
126 A., Nixon N., Yap C., Ball P., Cain M., Carmen E., Connolly A., Fletcher B., Frankowska A., Gardner G., James A.,  
127 Kendrick I., Mair S., Morris B., Sinclair M. The Regenerative Lens: A conceptual framework for regenerative  
128 socialecological systems. *One Earth*. <https://doi.org/10.1016/j.oneear.2023.06.006>, 2023.  
129 Dunlap, R. E. Paradigmatic Change in Social Science: From Human Exemptionalism to an Ecological Paradigm.  
130 *American Behavioral Scientist* 24:5-14. <https://doi.org/10.1177/000276428002400102>, 1980.  
131 Galafassi, D. The Transformative Imagination: Re-Imagining the World Towards Sustainability. Doctoral  
132 dissertation, Stockholm Resilience Centre, Stockholm University. DiVA, id: diva2:1178816, 2018.  
133 Gupta, J., Liverman D., Prodani K., Aldunce P., Bai X., Broadgate W., Ciobanu D., Gifford L., Gordon C., Hurlbert M.  
134 , Inoue C.Y.A., Jacobson L., Kanie N., Lade S., Lenton T., Obura D., Okereke C., Otto I.M., Pereira L., Rockström  
135 J., Scholtens J., Rocha J., Stewart-Koster B., Tàbara J. D., Rammelt C., Verburg P. Earth System Justice needed  
136 to identify and live within Earth System Boundaries. *Nature - Sustainability*.  
137 <https://doi.org/10.1038/s41893-023-01064-1>, 2023  
138 Lenton T.M. Tipping positive change. *Philosophical Transactions Royal Society, B*, 375: 20190123.  
139 <https://doi.org/10.1098/rstb.2019.0123>, 2020.  
140 Otto I.M., Donges J.F., Cremades R., Bhowmik A., Hewitt R.J., Lucht W., Rockström J., Allerberger F., McCaffrey M.,  
141 Doe SSP, Lenferna A., Morán N., van Vuuren D.P., Schellnhuber H.J. 2020. Social tipping dynamics for stabilizing  
142 Earth's climate by 2050. *Proceedings of the National Academy of Sciences of the United States of*  
143 *America*, 117(5), 2354–2365. <https://doi.org/10.1073/pnas.1900577117>  
144 Rockström, J., Gupta, J., Lenton, T.M., Qin, D., Lade, S.J., Abrams, J.F., Jacobson, L., Rocha, J.C., Zimm, C., Bai, X.,  
145 Bala, G., Bringezu, S., Broadgate, W., Bunn, S.E., DeClerck, F., Ebi, K.L., Gong, P., Gordon, C., Kanie, N., Liverman,  
146 D.N., Nakicenovic, N., Obura, D., Ramanathan, V., Verburg, P.H., van Vuuren, D.P., Winkelmann R. Identifying a  
147 safe and just corridor for people and the planet. *Earths Future* 9, e2020EF001866, 2021.  
148 Tàbara, J. D. Regenerative sustainability. Towards a relational model of possibilities for the emergence of positive  
149 tipping points. *Environmental Sociology*. <https://doi.org/10.1080/23251042.2023.2239538>, 2023  
150 Tàbara J.D., Frantzeskaki, N., Hölscher, K., Pedde, S. Lamperti, F. Kok, K., Christensen, J.H., Jäger, J., and Berry, P.  
151 Positive tipping points in a rapidly warming world. *Current Opinion in Environmental Sustainability*, 31: 120-  
152 129. <https://doi.org/10.1016/j.cosust.2018.01.012>, 2018  
153 Tàbara, J.D., Jäger, J., Mangalagiu D. & Grasso, M.. Defining Transformative Climate Science in the context of high-  
154 end climate change. *Regional Environmental Change*, 19(3):807-818. [https://doi.org/10.1007/s10113-018-](https://doi.org/10.1007/s10113-018-1288-8)  
155 [1288-8](https://doi.org/10.1007/s10113-018-1288-8), 2018  
156

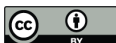

157 **Competing interests**

158

159 The author has declared no competing interests

160

161 **Acknowledgements:**

162 This ESD idea has benefited from discussions carried out within the EU funded projects TIPPING.plus (GA884565)

163 and TRANSPATH (GA101081984) as well as the research network led by Exeter University working on the State of

164 Tipping Points Report for Cop28.
